# Supplementary material for: Leptin signalling regulates transcriptional differences in granulosa cells from genetically obese mice but not the activation of NLRP3 inflammasome
Source: PubMed Central journal article supplement (PMC10997671; doi:10.1038/s41598-024-58181-w), 2024-04-05

A

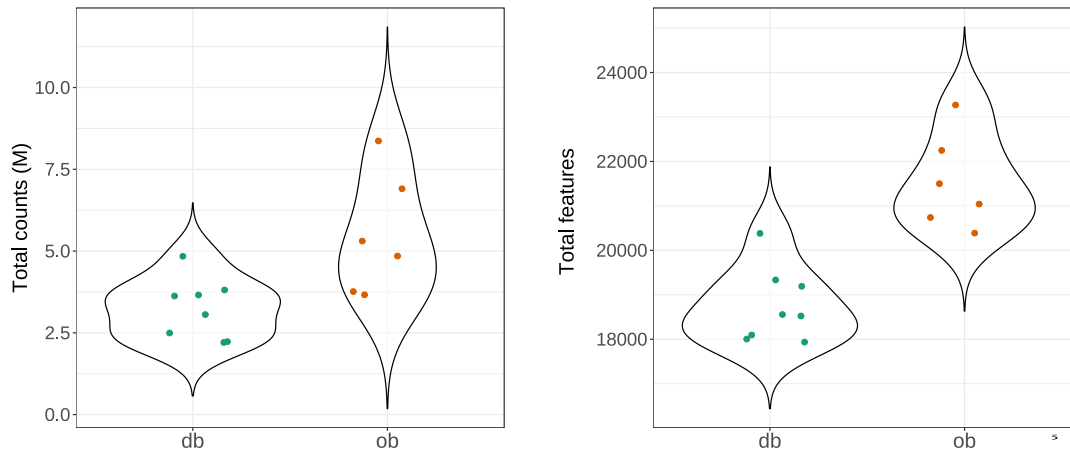

B

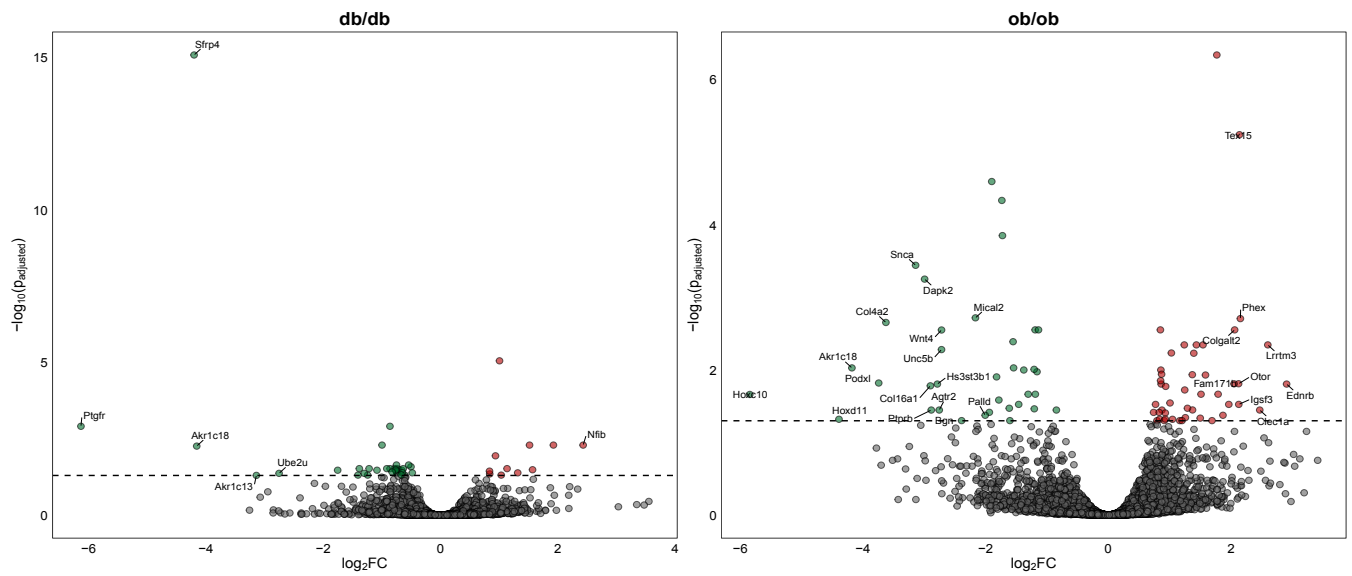

C

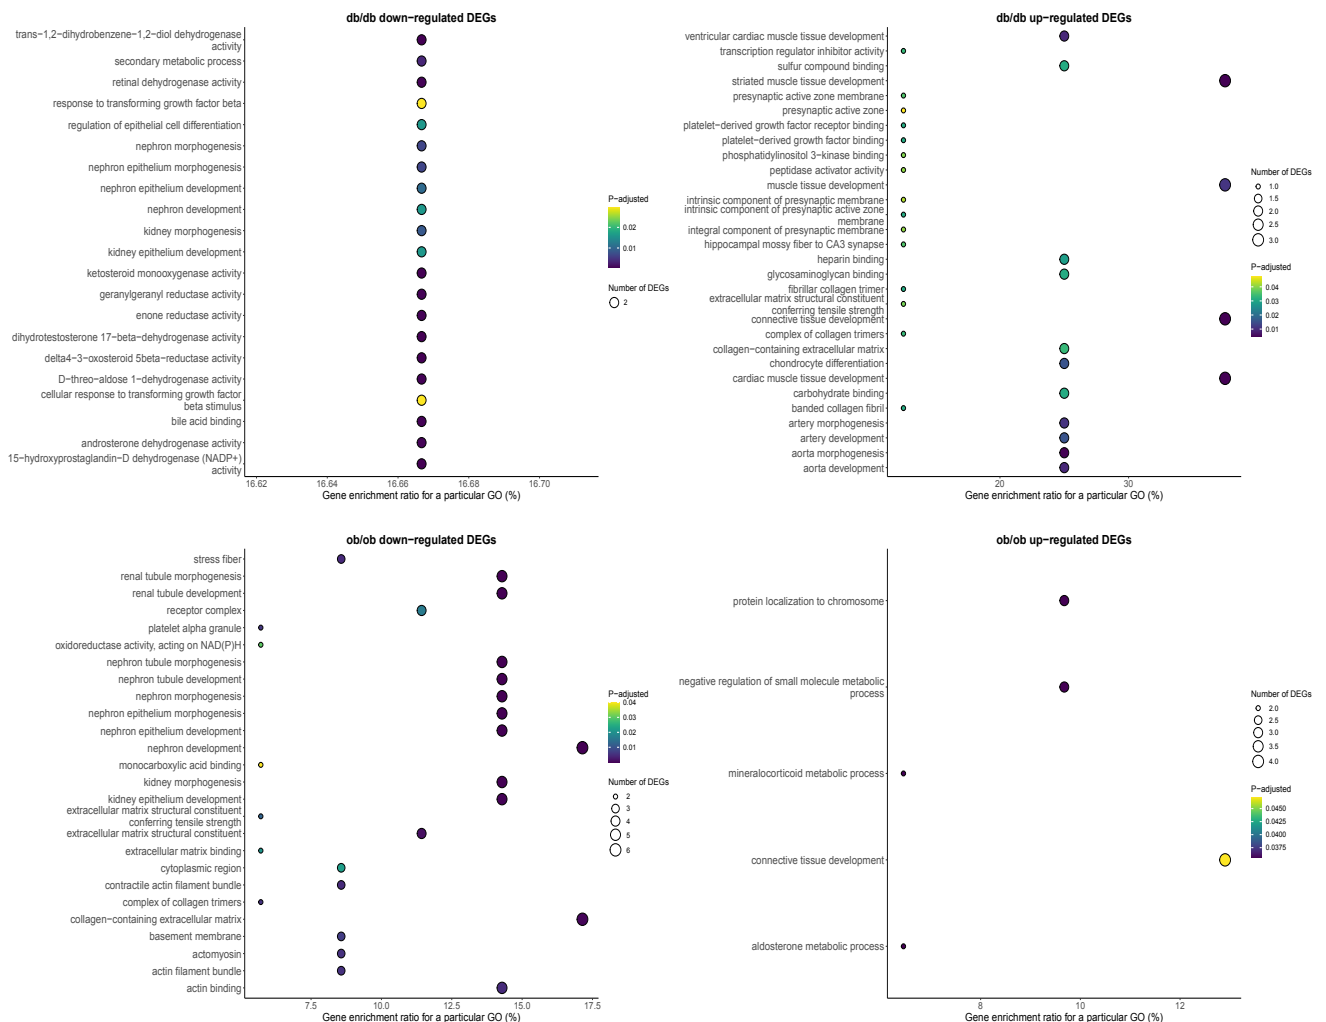

Supplement: 41598_2024_58181_MOESM1_ESM.pdf [file 41598_2024_58181_MOESM1_ESM.pdf]
